# Supplementary material
Source: PubMed Central journal article supplement (PMC3837803)
Supplement: AEM.02937-13_zam999104953so1.pdf [file AEM.02937-13_zam999104953so1.pdf]

**TABLE S1** Composition of diets fed to sows during gestation and lactation (fresh weight basis, %)

| <b>Ingredient<sup>a</sup></b>               | <b>Gestation</b> |           | <b>Lactation</b> |           |
|---------------------------------------------|------------------|-----------|------------------|-----------|
|                                             | <b>Non-GM</b>    | <b>GM</b> | <b>Non-GM</b>    | <b>GM</b> |
| Maize                                       | 86.55            | 86.55     | 74.42            | 74.42     |
| Soybean meal (non-GM)                       | 10.33            | 10.33     | 19.30            | 19.30     |
| Soybean oil                                 | -                | -         | 3.02             | 3.02      |
| L-Lysine HCl                                | 0.16             | 0.16      | 0.25             | 0.25      |
| DL-Methionine                               | -                | -         | 0.10             | 0.10      |
| L-Threonine                                 | -                | -         | 0.06             | 0.06      |
| Vitamin and mineral premix <sup>b</sup>     | 0.10             | 0.10      | 0.10             | 0.10      |
| Salt                                        | 0.40             | 0.40      | 0.40             | 0.40      |
| Di-calcium phosphate                        | 1.36             | 1.36      | 1.29             | 1.29      |
| Limestone flour                             | 1.10             | 1.10      | 1.06             | 1.06      |
| <b>Analysed chemical composition</b>        |                  |           |                  |           |
| Dry matter                                  | 88.40            | 87.80     | 89.50            | 88.60     |
| Crude protein                               | 11.80            | 11.00     | 15.60            | 15.00     |
| Acid hydrolyzed fat                         | 3.00             | 3.20      | 5.90             | 6.00      |
| Crude fibre                                 | 1.70             | 1.60      | 1.60             | 1.90      |
| Ash                                         | 4.10             | 4.30      | 4.60             | 4.30      |
| Lysine                                      | 0.64             | 0.68      | 1.01             | 0.96      |
| Ca <sup>c</sup>                             | 7.60             | 7.60      | 7.50             | 7.50      |
| P <sup>c</sup>                              | 6.10             | 6.10      | 6.20             | 6.20      |
| Digestible energy, MJ of DE/kg <sup>c</sup> | 13.80            | 13.80     | 14.50            | 14.50     |

<sup>a</sup> Non-GM; non-GM near isogenic maize; GM; genetically modified Bt MON810 maize.

<sup>b</sup> Premix provided per kg of complete diet: Cu from copper sulphate, 15 mg; Fe from ferrous sulphate monohydrate, 70 mg; Mn from manganese oxide, 62 mg; Zn from zinc oxide, 80 mg; I from potassium iodate, 0.6 mg; Se from sodium selenite, 0.2 mg; retinyl acetate, 3.44 mg; cholecalciferol, 25 µg; DL-alpha-tocopheryl acetate, 100 mg; vitamin K, 2 mg; vitamin B<sub>12</sub>, 15 µg; riboflavin, 5 mg; nicotinic acid, 12 mg; pantothenic acid, 10 mg; choline chloride, 500 mg; vitamin B<sub>1</sub>, 2 mg; and vitamin B<sub>6</sub>, 3 mg.

<sup>c</sup> Calculated values.

**TABLE S2** Composition of experimental diets fed to offspring from weaning for 115 days (fresh weight basis, %)

| <b>Ingredient<sup>a</sup></b>        | <b>Starter (d 0 – 7)</b> |                   | <b>Link (d 8 – 30)</b> |                   | <b>Grower (d 31 – 70)</b> |                   | <b>Finisher 1 (d 71 – 100)</b> |                   | <b>Finisher 2 (d 101 – 115)</b> |                   |
|--------------------------------------|--------------------------|-------------------|------------------------|-------------------|---------------------------|-------------------|--------------------------------|-------------------|---------------------------------|-------------------|
|                                      | <b>Non-GM</b>            | <b>GM</b>         | <b>Non-GM</b>          | <b>GM</b>         | <b>Non-GM</b>             | <b>GM</b>         | <b>Non-GM</b>                  | <b>GM</b>         | <b>Non-GM</b>                   | <b>GM</b>         |
| Maize                                | 27.33                    | 27.33             | 38.88                  | 38.88             | 65.31                     | 65.31             | 73.33                          | 73.33             | 79.05                           | 79.05             |
| Soybean meal (non-GM)                | 24.00                    | 24.00             | 25.00                  | 25.00             | 28.64                     | 28.64             | 22.76                          | 22.76             | 17.35                           | 17.35             |
| Lactofeed 70 <sup>b</sup>            | 25.00                    | 25.00             | 20.00                  | 20.00             | 0                         | 0                 | 0                              | 0                 | 0                               | 0                 |
| Immunopro 35 <sup>c</sup>            | 12.50                    | 12.50             | 9.00                   | 9.00              | 0                         | 0                 | 0                              | 0                 | 0                               | 0                 |
| Soybean oil                          | 8.00                     | 8.00              | 4.00                   | 4.00              | 2.37                      | 2.37              | 0.06                           | 0.06              | 0                               | 0                 |
| L-Lysine HCl                         | 0.30                     | 0.30              | 0.30                   | 0.30              | 0.36                      | 0.36              | 0.43                           | 0.43              | 0.49                            | 0.49              |
| DL-Methionine                        | 0.25                     | 0.25              | 0.20                   | 0.20              | 0.14                      | 0.14              | 0.14                           | 0.14              | 0.14                            | 0.14              |
| L-Threonine                          | 0.12                     | 0.12              | 0.12                   | 0.12              | 0.15                      | 0.15              | 0.17                           | 0.17              | 0.19                            | 0.19              |
| L-Tryptophan                         | 0.10                     | 0.10              | 0.10                   | 0.10              | 0.05                      | 0.05              | 0.07                           | 0.07              | 0.08                            | 0.08              |
| Vitamin/mineral premix               | 0.30 <sup>d</sup>        | 0.30 <sup>d</sup> | 0.30 <sup>d</sup>      | 0.30 <sup>d</sup> | 0.10 <sup>e</sup>         | 0.10 <sup>e</sup> | 0.10 <sup>e</sup>              | 0.10 <sup>e</sup> | 0.10 <sup>e</sup>               | 0.10 <sup>e</sup> |
| Mycosorb <sup>f</sup>                | 0.20                     | 0.20              | 0.20                   | 0.20              | 0.20                      | 0.20              | 0.20                           | 0.20              | 0.20                            | 0.20              |
| Salt                                 | 0.30                     | 0.30              | 0.30                   | 0.30              | 0.30                      | 0.30              | 0.30                           | 0.30              | 0.30                            | 0.30              |
| DiCal Phos                           | 0.50                     | 0.50              | 0.50                   | 0.50              | 1.19                      | 1.19              | 1.13                           | 1.13              | 0.90                            | 0.90              |
| Limestone flour                      | 1.10                     | 1.10              | 1.10                   | 1.10              | 1.19                      | 1.19              | 1.26                           | 1.26              | 1.15                            | 1.15              |
| Myco Curb <sup>g</sup>               | 0                        | 0                 | 0                      | 0                 | 0                         | 0                 | 0.05                           | 0.05              | 0.05                            | 0.05              |
| <b>Analyzed chemical composition</b> |                          |                   |                        |                   |                           |                   |                                |                   |                                 |                   |
| Dry matter                           | 91.4                     | 91.0              | 90.9                   | 90.5              | 89.2                      | 88.7              | 87.5                           | 87.7              | 87.4                            | 88.2              |
| Crude protein                        | 20.2                     | 21.2              | 19.8                   | 20.4              | 19.7                      | 20.1              | 17.1                           | 17.2              | 15.1                            | 15.3              |
| Acid hydrolyzed fat                  | 10.1                     | 9.9               | 6.8                    | 7.0               | 5.4                       | 5.2               | 3.1                            | 3.4               | 2.9                             | 3.0               |
| Crude fiber                          | 1.7                      | 1.4               | 1.5                    | 1.3               | 2.1                       | 2.1               | 2.1                            | 1.8               | 1.8                             | 1.8               |
| Ash                                  | 6.0                      | 5.9               | 5.9                    | 5.8               | 4.8                       | 4.8               | 5.2                            | 5.6               | 4.8                             | 4.4               |
| Lysine                               | 1.47                     | 1.46              | 1.46                   | 1.47              | 1.33                      | 1.34              | 1.30                           | 1.27              | 1.12                            | 1.14              |
| DE, MJ/kg <sup>h</sup>               | 16.33                    | 16.33             | 15.38                  | 15.38             | 14.50                     | 14.50             | 14.00                          | 14.00             | 13.99                           | 13.99             |

<sup>a</sup> Non-GM; non-GM near isogenic maize; GM; genetically modified Bt MON810 maize.

<sup>b</sup> Lactofeed 70 contains 70% lactose, 11.5% protein, 0.5% oil, 7.5% ash and 0.5% fibre (Volac, Cambridge, UK).

<sup>c</sup> Immunopro 35 contains whey protein powder - protein 35% (Volac, Cambridge, UK).

<sup>d</sup> Premix provided per kg of complete diet: Cu, 155 mg; Fe, 90 mg; Mn, 47 mg; Zn, 120 mg, I, 0.6 mg; Se, 0.3 mg; retinyl acetate 2.1 mg; cholecalciferol, 25 µg; DL-alpha-tocopheryl acetate, 100 mg; vitamin K, 4 mg; vitamin B<sub>12</sub>, 15 µg; riboflavin, 2 mg; nicotinic acid, 12 mg; pantothenic acid, 10 mg; choline chloride, 250 mg; vitamin B<sub>1</sub>, 2 mg; vitamin B<sub>6</sub>, 3 mg.

<sup>e</sup> Premix provided per kg of complete diet: Cu, 15 mg; Fe, 24 mg; Mn, 31 mg; Zn, 80 mg, I, 0.3 mg; Se, 0.2 mg; retinyl acetate 0.7 mg; cholecalciferol, 25 µg; DL-alpha-tocopheryl acetate, 40 mg; vitamin K, 4 mg; vitamin B<sub>12</sub>, 15 µg; riboflavin, 2 mg; nicotinic acid, 12 mg; pantothenic acid, 10 mg; vitamin B<sub>1</sub>, 2 mg; vitamin B<sub>6</sub>, 3 mg.

<sup>f</sup> Mycosorb is an organic mycotoxin adsorbent (Alltech, Dunboyne, Co. Meath, Ireland).

<sup>g</sup> Myco Curb is a mould inhibitor (Kemin Europa N. V. Herentals, Belgium).

<sup>h</sup> Calculated values.

**TABLE S3** Fecal bacterial counts from sows fed a GM maize diet during gestation and lactation<sup>a</sup>

| Day                  | Treatment <sup>b</sup>    |      | pooled SEM | P-value |
|----------------------|---------------------------|------|------------|---------|
|                      | Non-GM                    | GM   |            |         |
|                      | <i>Enterobacteriaceae</i> |      |            |         |
| day 110 of gestation | 7.44                      | 7.68 | 0.132      | 0.37    |
| day 28 of lactation  | 6.69                      | 6.98 | 0.132      | 0.28    |
|                      | <i>Lactobacillus</i>      |      |            |         |
| day 110 of gestation | 7.69                      | 7.59 | 0.103      | 0.51    |
| day 28 of lactation  | 8.29                      | 8.32 | 0.183      | 0.93    |
|                      | Total anaerobes           |      |            |         |
| day 110 of gestation | 8.67                      | 8.66 | 0.111      | 0.92    |
| day 28 of lactation  | 8.23                      | 8.37 | 0.154      | 0.58    |

<sup>a</sup>Data are presented as least squares means ( $\log_{10}$  CFU g<sup>-1</sup>). Variability present at day

0 of gestation has been accounted for by including day 0 counts as covariates in the statistical model.

<sup>b</sup> Non-GM; non-GM near isogenic maize; GM; genetically modified Bt MON810 maize.

**TABLE S4** Full outline of fecal microbiota from sows at day 110 of gestation

| <b>Phylum</b>                                 | <b>Overall values</b>            |                                   |                                  |
|-----------------------------------------------|----------------------------------|-----------------------------------|----------------------------------|
|                                               | <b>5<sup>th</sup> percentile</b> | <b>95<sup>th</sup> percentile</b> | <b>median relative abundance</b> |
| <i>Firmicutes</i>                             | 47.4                             | 82.7                              | 62.9                             |
| <i>Spirochaetes</i>                           | 6.7                              | 22.9                              | 15.9                             |
| <i>Bacteroidetes</i>                          | 7.5                              | 20.9                              | 14.2                             |
| <i>Proteobacteria</i>                         | 1.5                              | 11.0                              | 3.0                              |
| <i>Lentisphaerae</i>                          | 0.3                              | 4.1                               | 1.9                              |
| <i>Fibrobacteres</i>                          | 0.0                              | 3.3                               | 0.8                              |
| <i>Planctomycetes</i>                         | 0.0                              | 1.0                               | 0.5                              |
| uncultured <i>Bacteroidetes</i>               | 0.0                              | 1.2                               | 0.3                              |
| <i>Synergistetes</i>                          | 0.0                              | 0.4                               | 0.0                              |
| <i>Actinobacteria</i>                         | 0.0                              | 0.2                               | 0.0                              |
| <i>Verrucomicrobia</i>                        | 0.0                              | 0.2                               | 0.0                              |
| <i>Deferribacteres</i>                        | 0.0                              | 0.0                               | 0.0                              |
| uncultured <i>Lentisphaerae</i>               | 0.0                              | 0.0                               | 0.0                              |
| <b>Family</b>                                 |                                  |                                   |                                  |
| <i>Lachnospiraceae</i>                        | 18.0                             | 37.6                              | 27.3                             |
| <i>Ruminococcaceae</i>                        | 14.1                             | 32.5                              | 24.9                             |
| <i>Spirochaetaceae</i>                        | 6.7                              | 22.7                              | 15.9                             |
| <i>Rikenellaceae</i>                          | 1.9                              | 11.2                              | 3.5                              |
| <i>Clostridiaceae</i>                         | 1.4                              | 3.9                               | 2.6                              |
| <i>Porphyromonadaceae</i>                     | 0.5                              | 4.3                               | 1.9                              |
| <i>Prevotellaceae</i>                         | 0.7                              | 3.8                               | 1.8                              |
| <i>Peptostreptococcaceae</i>                  | 0.8                              | 2.8                               | 1.7                              |
| <i>Veillonellaceae</i>                        | 0.4                              | 1.6                               | 0.9                              |
| <i>Succinivibrionaceae</i>                    | 0.0                              | 8.0                               | 0.8                              |
| <i>Fibrobacteraceae</i>                       | 0.0                              | 3.3                               | 0.8                              |
| uncultured <i>Rikenellaceae</i>               | 0.2                              | 2.6                               | 0.7                              |
| <i>Eubacteriaceae</i>                         | 0.3                              | 0.9                               | 0.5                              |
| <i>Streptococcaceae</i>                       | 0.0                              | 3.9                               | 0.4                              |
| <i>Desulfovibrionaceae</i>                    | 0.1                              | 1.1                               | 0.4                              |
| uncultured <i>Lachnospiraceae</i>             | 0.0                              | 1.0                               | 0.4                              |
| <i>Peptococcaceae</i>                         | 0.0                              | 0.8                               | 0.3                              |
| <i>Planctomycetaceae</i>                      | 0.0                              | 0.9                               | 0.3                              |
| <i>Victivallaceae</i>                         | 0.0                              | 1.4                               | 0.3                              |
| <i>Erysipelotrichaceae</i>                    | 0.0                              | 1.0                               | 0.3                              |
| <i>Bacteroidaceae</i>                         | 0.0                              | 0.9                               | 0.3                              |
| <i>Enterobacteriaceae</i>                     | 0.0                              | 1.0                               | 0.2                              |
| <i>Lactobacillaceae</i>                       | 0.0                              | 0.8                               | 0.2                              |
| <i>Rhodospirillaceae</i>                      | 0.0                              | 0.4                               | 0.0                              |
| <i>Neisseriaceae</i>                          | 0.0                              | 0.0                               | 0.0                              |
| <i>Synergistaceae</i>                         | 0.0                              | 0.4                               | 0.0                              |
| <i>Anaeroplasmataceae</i>                     | 0.0                              | 0.8                               | 0.0                              |
| <i>Campylobacteraceae</i>                     | 0.0                              | 0.2                               | 0.0                              |
| <i>Helicobacteraceae</i>                      | 0.0                              | 0.2                               | 0.0                              |
| <i>Clostridiales family XI incertae sedis</i> | 0.0                              | 0.2                               | 0.0                              |
| <i>Alcaligenaceae</i>                         | 0.0                              | 0.2                               | 0.0                              |

|                                              | Overall values             |                             |                           |
|----------------------------------------------|----------------------------|-----------------------------|---------------------------|
|                                              | 5 <sup>th</sup> percentile | 95 <sup>th</sup> percentile | median relative abundance |
| <i>Verrucomicrobiaceae</i>                   | 0.0                        | 0.0                         | 0.0                       |
| <i>Deferribacteraceae</i>                    | 0.0                        | 0.0                         | 0.0                       |
| <i>Coriobacterineae</i>                      | 0.0                        | 0.0                         | 0.0                       |
| <i>Oxalobacteraceae</i>                      | 0.0                        | 0.0                         | 0.0                       |
| uncultured <i>Ruminococcaceae</i>            | 0.0                        | 0.4                         | 0.0                       |
| uncultured <i>Succinivibrionaceae</i>        | 0.0                        | 0.3                         | 0.0                       |
| uncultured <i>Rhodospirillaceae</i>          | 0.0                        | 0.2                         | 0.0                       |
| uncultured <i>Erysipelotrichaceae</i>        | 0.0                        | 0.0                         | 0.0                       |
| Uncultured family XIII incertae sedis        | 0.0                        | 0.2                         | 0.0                       |
| <b>Genus</b>                                 |                            |                             |                           |
| <i>Treponema</i>                             | 6.7                        | 22.4                        | 15.8                      |
| uncultured <i>Ruminococcus</i>               | 3.0                        | 11.2                        | 6.8                       |
| <i>Clostridium</i>                           | 0.8                        | 3.1                         | 2.0                       |
| <i>Parabacteroides</i>                       | 0.7                        | 4.2                         | 1.9                       |
| <i>Prevotella</i>                            | 0.7                        | 3.8                         | 1.8                       |
| <i>Ruminococcus</i>                          | 0.5                        | 3.7                         | 1.5                       |
| <i>Ruminococcaceae incertae sedis</i>        | 0.5                        | 2.3                         | 1.1                       |
| <i>Peptostreptococcaceae incertae sedis</i>  | 0.5                        | 1.9                         | 1.1                       |
| <i>Lachnospiraceae incertae sedis</i>        | 0.6                        | 2.0                         | 1.0                       |
| <i>Anaerobiospirillum</i>                    | 0.0                        | 8.0                         | 0.8                       |
| <i>Phascolarctobacterium</i>                 | 0.4                        | 1.4                         | 0.7                       |
| uncultured <i>Planctomycetes</i>             | 0.0                        | 1.0                         | 0.4                       |
| <i>Streptococcus</i>                         | 0.0                        | 3.9                         | 0.4                       |
| <i>Desulfovibrio</i>                         | 0.0                        | 1.1                         | 0.4                       |
| <i>Turcibacter</i>                           | 0.0                        | 1.0                         | 0.3                       |
| <i>Bacteroides</i>                           | 0.0                        | 0.9                         | 0.3                       |
| <i>Enterobacteriaceae</i> -associated genera | 0.0                        | 0.9                         | 0.2                       |
| <i>Anaerotruncus</i>                         | 0.0                        | 0.4                         | 0.2                       |
| <i>Fibrobacter</i>                           | 0.0                        | 3.0                         | 0.2                       |
| <i>Lactobacillus</i>                         | 0.0                        | 0.8                         | 0.2                       |
| <i>Oscillospira</i>                          | 0.0                        | 0.8                         | 0.2                       |
| <i>Sarcina</i>                               | 0.0                        | 0.5                         | 0.1                       |
| <i>Thalassospira</i>                         | 0.0                        | 0.4                         | 0.0                       |
| <i>Microvirgula</i>                          | 0.0                        | 0.0                         | 0.0                       |
| <i>Paludibacter</i>                          | 0.0                        | 0.6                         | 0.0                       |
| <i>Dethiosulfovibrio</i>                     | 0.0                        | 0.5                         | 0.0                       |
| <i>Coprococcus</i>                           | 0.0                        | 0.5                         | 0.0                       |
| <i>Eubacterium</i>                           | 0.0                        | 0.0                         | 0.0                       |
| <i>Anaeroplasm</i>                           | 0.0                        | 1.1                         | 0.0                       |
| <i>Victivallis</i>                           | 0.0                        | 0.5                         | 0.0                       |
| <i>Spirochaeta</i>                           | 0.0                        | 0.3                         | 0.0                       |
| <i>Campylobacter</i>                         | 0.0                        | 0.2                         | 0.0                       |
| <i>Quinella</i>                              | 0.0                        | 0.0                         | 0.0                       |
| <i>Helicobacter</i>                          | 0.0                        | 0.2                         | 0.0                       |
| <i>Sutterella</i>                            | 0.0                        | 0.2                         | 0.0                       |

|                       | <b>Overall values</b>            |                                   |                                  |
|-----------------------|----------------------------------|-----------------------------------|----------------------------------|
|                       | <b>5<sup>th</sup> percentile</b> | <b>95<sup>th</sup> percentile</b> | <b>median relative abundance</b> |
| <i>Anaerovibrio</i>   | 0.0                              | 0.2                               | 0.0                              |
| <i>Akkermansia</i>    | 0.0                              | 0.0                               | 0.0                              |
| <i>Blautia</i>        | 0.0                              | 0.2                               | 0.0                              |
| <i>Acetitomaculum</i> | 0.0                              | 0.2                               | 0.0                              |
| <i>Mucispirillum</i>  | 0.0                              | 0.0                               | 0.0                              |

**TABLE S5** Full outline of fecal microbiota of pigs at weaning (~28 days of age)

| <b>Phylum</b>                                 | <b>Overall values</b>            |                                   |                                  |
|-----------------------------------------------|----------------------------------|-----------------------------------|----------------------------------|
|                                               | <b>5<sup>th</sup> percentile</b> | <b>95<sup>th</sup> percentile</b> | <b>median relative abundance</b> |
| <i>Firmicutes</i>                             | 19.5                             | 75.8                              | 54.0                             |
| <i>Proteobacteria</i>                         | 5.0                              | 57.0                              | 22.0                             |
| <i>Bacteroidetes</i>                          | 6.2                              | 35.4                              | 18.6                             |
| <i>Spirochaetes</i>                           | 0.0                              | 16.9                              | 1.0                              |
| <i>Synergistetes</i>                          | 0.0                              | 9.0                               | 0.4                              |
| <i>Lentisphaerae</i>                          | 0.0                              | 2.5                               | 0.3                              |
| <i>Planctomycetes</i>                         | 0.0                              | 1.9                               | 0.2                              |
| <i>Fibrobacteres</i>                          | 0.0                              | 0.3                               | 0.0                              |
| <i>Actinobacteria</i>                         | 0.0                              | 0.7                               | 0.0                              |
| <i>Verrucomicrobia</i>                        | 0.0                              | 0.8                               | 0.0                              |
| <i>Deferribacteres</i>                        | 0.0                              | 0.4                               | 0.0                              |
| <i>Fusobacteria</i>                           | 0.0                              | 9.8                               | 0.0                              |
| <i>Chlamydiae</i>                             | 0.0                              | 0.2                               | 0.0                              |
| <i>Euryarchaeota</i>                          | 0.0                              | 0.1                               | 0.0                              |
| <b>Family</b>                                 |                                  |                                   |                                  |
| <i>Ruminococcaceae</i>                        | 5.4                              | 26.8                              | 17.5                             |
| <i>Lachnospiraceae</i>                        | 4.0                              | 42.1                              | 17.0                             |
| <i>Succinivibrionaceae</i>                    | 0.0                              | 55.7                              | 15.1                             |
| <i>Veillonellaceae</i>                        | 1.4                              | 12.7                              | 4.8                              |
| <i>Prevotellaceae</i>                         | 0.2                              | 14.4                              | 3.5                              |
| <i>Rikenellaceae</i>                          | 0.6                              | 13.1                              | 3.2                              |
| <i>Bacteroidaceae</i>                         | 0.0                              | 20.0                              | 2.9                              |
| <i>Porphyromonadaceae</i>                     | 0.2                              | 7.7                               | 1.6                              |
| <i>Enterobacteriaceae</i>                     | 0.0                              | 13.6                              | 1.3                              |
| <i>Desulfovibrionaceae</i>                    | 0.1                              | 6.3                               | 1.2                              |
| <i>Spirochaetaceae</i>                        | 0.0                              | 16.9                              | 1.0                              |
| <i>Lactobacillaceae</i>                       | 0.0                              | 7.3                               | 0.8                              |
| <i>Synergistaceae</i>                         | 0.0                              | 9.0                               | 0.4                              |
| <i>Erysipelotrichales incertae sedis</i>      | 0.0                              | 8.3                               | 0.3                              |
| <i>Clostridiaceae</i>                         | 0.0                              | 2.4                               | 0.3                              |
| <i>Victivallaceae</i>                         | 0.0                              | 1.6                               | 0.2                              |
| <i>Planctomycetaceae</i>                      | 0.0                              | 1.9                               | 0.2                              |
| <i>Eubacteriaceae</i>                         | 0.0                              | 0.8                               | 0.2                              |
| <i>Alcaligenaceae</i>                         | 0.0                              | 0.8                               | 0.2                              |
| <i>Peptostreptococcaceae</i>                  | 0.0                              | 1.5                               | 0.2                              |
| <i>Peptococcaceae</i>                         | 0.0                              | 0.8                               | 0.0                              |
| <i>Streptococcaceae</i>                       | 0.0                              | 0.6                               | 0.0                              |
| <i>Erysipelotrichaceae</i>                    | 0.0                              | 0.2                               | 0.0                              |
| <i>Rhodospirillaceae</i>                      | 0.0                              | 0.7                               | 0.0                              |
| <i>Neisseriaceae</i>                          | 0.0                              | 0.0                               | 0.0                              |
| <i>Fibrobacteraceae</i>                       | 0.0                              | 0.3                               | 0.0                              |
| <i>Campylobacteraceae</i>                     | 0.0                              | 1.8                               | 0.0                              |
| <i>Helicobacteraceae</i>                      | 0.0                              | 0.5                               | 0.0                              |
| <i>Clostridiales family XI incertae sedis</i> | 0.0                              | 0.0                               | 0.0                              |
| <i>Verrucomicrobiaceae</i>                    | 0.0                              | 0.6                               | 0.0                              |



|                                                       | Overall values             |                             |                           |
|-------------------------------------------------------|----------------------------|-----------------------------|---------------------------|
|                                                       | 5 <sup>th</sup> percentile | 95 <sup>th</sup> percentile | median relative abundance |
| <i>Deferribacteraceae</i>                             | 0.0                        | 0.5                         | 0.0                       |
| <i>Coriobacterineae</i>                               | 0.0                        | 0.5                         | 0.0                       |
| <i>Oxalobacteraceae</i>                               | 0.0                        | 0.0                         | 0.0                       |
| <i>Moraxellaceae</i>                                  | 0.0                        | 0.0                         | 0.0                       |
| <i>Leuconostocaceae</i>                               | 0.0                        | 0.0                         | 0.0                       |
| <i>Bifidobacteriaceae</i>                             | 0.0                        | 0.0                         | 0.0                       |
| <i>Fusobacteriaceae</i>                               | 0.0                        | 9.8                         | 0.0                       |
| <i>Enterococcaceae</i>                                | 0.0                        | 0.2                         | 0.0                       |
| <i>Aeromonadaceae</i>                                 | 0.0                        | 0.0                         | 0.0                       |
| <i>Staphylococcaceae</i>                              | 0.0                        | 0.0                         | 0.0                       |
| <i>Chlamydiaceae</i>                                  | 0.0                        | 0.2                         | 0.0                       |
| <i>Methanobacteriaceae</i>                            | 0.0                        | 0.1                         | 0.0                       |
| <i>Actinomycineae</i>                                 | 0.0                        | 0.1                         | 0.0                       |
| <b>Genus</b>                                          |                            |                             |                           |
| <i>Anaerobiospirillum</i>                             | 0.0                        | 55.7                        | 15.1                      |
| <i>Prevotella</i>                                     | 0.2                        | 14.4                        | 3.5                       |
| <i>Bacteroides</i>                                    | 0.0                        | 20.0                        | 2.9                       |
| <i>Phascolarctobacterium</i>                          | 0.9                        | 5.4                         | 2.4                       |
| <i>Lachnospiraceae incertae sedis</i>                 | 0.0                        | 7.5                         | 1.8                       |
| <i>Parabacteroides</i>                                | 0.2                        | 7.6                         | 1.6                       |
| uncultured <i>acterium</i>                            | 0.2                        | 8.0                         | 1.4                       |
| <i>Anaerovibrio</i>                                   | 0.0                        | 6.3                         | 1.2                       |
| <i>Desulfovibrio</i>                                  | 0.2                        | 4.2                         | 1.1                       |
| <i>Treponema</i>                                      | 0.0                        | 16.9                        | 1.0                       |
| <i>Enterobacteriaceae</i> -associated<br>genera       | 0.0                        | 13.5                        | 1.0                       |
| <i>Ruminococcaceae incertae sedis</i>                 | 0.1                        | 1.9                         | 0.8                       |
| uncultured <i>Ruminococcus</i>                        | 0.0                        | 3.4                         | 0.8                       |
| <i>Lactobacillus</i>                                  | 0.0                        | 7.3                         | 0.8                       |
| <i>Anaerotruncus</i>                                  | 0.0                        | 2.7                         | 0.4                       |
| <i>Subdoligranulum</i>                                | 0.0                        | 2.2                         | 0.4                       |
| <i>Ruminococcus</i>                                   | 0.0                        | 1.6                         | 0.4                       |
| <i>Megasphaera</i>                                    | 0.0                        | 3.8                         | 0.4                       |
| uncultured <i>Planctomycetes</i>                      | 0.0                        | 1.9                         | 0.2                       |
| <i>Sutterella</i>                                     | 0.0                        | 0.8                         | 0.2                       |
| <i>Blautia</i>                                        | 0.0                        | 0.9                         | 0.2                       |
| <i>Dethiosulfovibrio</i>                              | 0.0                        | 4.9                         | 0.2                       |
| <i>Clostridium</i>                                    | 0.0                        | 1.0                         | 0.1                       |
| <i>Oscillospira</i>                                   | 0.0                        | 0.0                         | 0.0                       |
| <i>Peptostreptococcaceae incertae</i><br><i>sedis</i> | 0.0                        | 1.0                         | 0.0                       |
| <i>Streptococcus</i>                                  | 0.0                        | 0.6                         | 0.0                       |
| <i>Turicibacter</i>                                   | 0.0                        | 0.0                         | 0.0                       |
| <i>Thalassospira</i>                                  | 0.0                        | 0.7                         | 0.0                       |
| <i>Microvirgula</i>                                   | 0.0                        | 0.0                         | 0.0                       |
| <i>Paludibacter</i>                                   | 0.0                        | 0.1                         | 0.0                       |
| <i>Fibrobacter</i>                                    | 0.0                        | 0.3                         | 0.0                       |
| <i>Coprococcus</i>                                    | 0.0                        | 0.4                         | 0.0                       |

|                                           | Overall values             |                             |                           |
|-------------------------------------------|----------------------------|-----------------------------|---------------------------|
|                                           | 5 <sup>th</sup> percentile | 95 <sup>th</sup> percentile | median relative abundance |
| <i>Eubacterium</i>                        | 0.0                        | 0.1                         | 0.0                       |
| <i>Victivallis</i>                        | 0.0                        | 0.4                         | 0.0                       |
| <i>Spirochaeta</i>                        | 0.0                        | 0.0                         | 0.0                       |
| <i>Campylobacter</i>                      | 0.0                        | 1.8                         | 0.0                       |
| <i>Helicobacter</i>                       | 0.0                        | 0.5                         | 0.0                       |
| <i>Akkermansia</i>                        | 0.0                        | 0.6                         | 0.0                       |
| <i>Acetitomaculum</i>                     | 0.0                        | 0.1                         | 0.0                       |
| <i>Mucispirillum</i>                      | 0.0                        | 0.5                         | 0.0                       |
| <i>Catabacter</i>                         | 0.0                        | 0.1                         | 0.0                       |
| <i>Leuconostoc</i>                        | 0.0                        | 0.0                         | 0.0                       |
| <i>Oribacterium</i>                       | 0.0                        | 0.4                         | 0.0                       |
| <i>Acidaminococcus</i>                    | 0.0                        | 2.5                         | 0.0                       |
| <i>Faecalibacterium</i>                   | 0.0                        | 1.0                         | 0.0                       |
| <i>Bifidobacterium</i>                    | 0.0                        | 0.0                         | 0.0                       |
| <i>Fusobacterium</i>                      | 0.0                        | 9.8                         | 0.0                       |
| <i>Enterococcus</i>                       | 0.0                        | 0.2                         | 0.0                       |
| <i>Catenibacterium</i>                    | 0.0                        | 0.4                         | 0.0                       |
| <i>Lachnospira</i>                        | 0.0                        | 0.7                         | 0.0                       |
| <i>Solobacterium</i>                      | 0.0                        | 0.1                         | 0.0                       |
| <i>Bilophila</i>                          | 0.0                        | 1.8                         | 0.0                       |
| <i>Alistipes</i>                          | 0.0                        | 0.9                         | 0.0                       |
| <i>Butyricimonas</i>                      | 0.0                        | 0.1                         | 0.0                       |
| <i>Succiniclasicum</i>                    | 0.0                        | 1.0                         | 0.0                       |
| <i>Peptococcus</i>                        | 0.0                        | 0.6                         | 0.0                       |
| <i>Gemella</i>                            | 0.0                        | 0.0                         | 0.0                       |
| <i>Cloacibacillus</i>                     | 0.0                        | 2.7                         | 0.0                       |
| <i>Roseburia</i>                          | 0.0                        | 0.3                         | 0.0                       |
| <i>Shuttleworthia</i>                     | 0.0                        | 0.1                         | 0.0                       |
| <i>uncultured rumen bacterium</i>         | 0.0                        | 0.0                         | 0.0                       |
| <i>uncultured Clostridiales bacterium</i> | 0.0                        | 0.0                         | 0.0                       |
| <i>Mitsuokella</i>                        | 0.0                        | 0.4                         | 0.0                       |
| <i>Chlamydia</i>                          | 0.0                        | 0.2                         | 0.0                       |
| <i>Methanobrevibacter</i>                 | 0.0                        | 0.1                         | 0.0                       |
| <i>Odoribacter</i>                        | 0.0                        | 0.0                         | 0.0                       |
| <i>Parasporobacterium-</i>                | 0.0                        | 0.2                         | 0.0                       |
| <i>Sporobacterium</i>                     |                            |                             |                           |
| <i>Hydrogenoanaerobacterium</i>           | 0.0                        | 0.1                         | 0.0                       |
| <i>Parvimonas</i>                         | 0.0                        | 0.0                         | 0.0                       |
| <i>uncultured Lachnospiraceae</i>         | 0.0                        | 0.2                         | 0.0                       |
| <i>bacterium</i>                          |                            |                             |                           |
| <i>Anaerovorax</i>                        | 0.0                        | 0.0                         | 0.0                       |
| <i>Mogibacterium</i>                      | 0.0                        | 0.0                         | 0.0                       |
| <i>Dysgonomonas</i>                       | 0.0                        | 0.0                         | 0.0                       |

**TABLE S6** Full outline of fecal microbiota of pigs at day 100 post-weaning

| <b>Phylum</b>                | <b>Overall values</b>            |                                   |                                  |
|------------------------------|----------------------------------|-----------------------------------|----------------------------------|
|                              | <b>5<sup>th</sup> percentile</b> | <b>95<sup>th</sup> percentile</b> | <b>median relative abundance</b> |
| <i>Firmicutes</i>            | 37.0                             | 77.5                              | 58.5                             |
| <i>Bacteroidetes</i>         | 7.0                              | 24.6                              | 16.1                             |
| <i>Spirochaetes</i>          | 2.2                              | 27.8                              | 13.3                             |
| <i>Proteobacteria</i>        | 2.0                              | 37.5                              | 4.1                              |
| <i>Lentisphaerae</i>         | 0.3                              | 4.7                               | 1.3                              |
| <i>Planctomycetes</i>        | 0.0                              | 2.9                               | 0.6                              |
| <i>Fibrobacteres</i>         | 0.0                              | 1.1                               | 0.1                              |
| <i>Synergistetes</i>         | 0.0                              | 0.3                               | 0.0                              |
| <i>Actinobacteria</i>        | 0.0                              | 0.2                               | 0.0                              |
| <i>Verrucomicrobia</i>       | 0.0                              | 0.1                               | 0.0                              |
| <i>Deferribacteres</i>       | 0.0                              | 0.2                               | 0.0                              |
| <i>Fusobacteria</i>          | 0.0                              | 0.0                               | 0.0                              |
| <i>Chlamydiae</i>            | 0.0                              | 0.0                               | 0.0                              |
| <b>Family</b>                |                                  |                                   |                                  |
| <i>Ruminococcaceae</i>       | 14.7                             | 33.8                              | 21.9                             |
| <i>Lachnospiraceae</i>       | 10.6                             | 45.5                              | 16.1                             |
| <i>Spirochaetaceae</i>       | 2.2                              | 27.8                              | 13.3                             |
| <i>Prevotellaceae</i>        | 1.7                              | 15.8                              | 5.6                              |
| <i>Rikenellaceae</i>         | 0.9                              | 13.5                              | 4.4                              |
| <i>Veillonellaceae</i>       | 0.3                              | 8.1                               | 2.5                              |
| <i>Succinivibrionaceae</i>   | 0.1                              | 37.1                              | 1.7                              |
| <i>Porphyromonadaceae</i>    | 0.3                              | 8.8                               | 1.5                              |
| <i>Clostridiaceae</i>        | 0.2                              | 5.2                               | 1.2                              |
| <i>Streptococcaceae</i>      | 0.0                              | 11.1                              | 1.0                              |
| <i>Lactobacillaceae</i>      | 0.0                              | 6.2                               | 0.9                              |
| <i>Peptostreptococcaceae</i> | 0.1                              | 3.0                               | 0.8                              |
| <i>Planctomycetaceae</i>     | 0.0                              | 2.9                               | 0.6                              |
| <i>Victivallaceae</i>        | 0.0                              | 3.0                               | 0.5                              |
| <i>Desulfovibrionaceae</i>   | 0.0                              | 1.6                               | 0.3                              |
| <i>Peptococcaceae</i>        | 0.0                              | 0.5                               | 0.3                              |
| <i>Eubacteriaceae</i>        | 0.0                              | 0.6                               | 0.2                              |
| <i>Fibrobacteraceae</i>      | 0.0                              | 1.1                               | 0.1                              |
| <i>Rhodospirillaceae</i>     | 0.0                              | 0.5                               | 0.1                              |
| <i>Enterobacteriaceae</i>    | 0.0                              | 0.7                               | 0.0                              |
| <i>Bacteroidaceae</i>        | 0.0                              | 0.2                               | 0.0                              |
| <i>Erysipelotrichaceae</i>   | 0.0                              | 0.2                               | 0.0                              |
| <i>Neisseriaceae</i>         | 0.0                              | 0.1                               | 0.0                              |
| <i>Synergistaceae</i>        | 0.0                              | 0.3                               | 0.0                              |
| <i>Anaeroplasmataceae</i>    | 0.0                              | 0.6                               | 0.0                              |
| <i>Helicobacteraceae</i>     | 0.0                              | 0.2                               | 0.0                              |
| <i>Alcaligenaceae</i>        | 0.0                              | 0.5                               | 0.0                              |
| <i>Deferribacteraceae</i>    | 0.0                              | 0.2                               | 0.0                              |
| <i>Coriobacterineae</i>      | 0.0                              | 0.1                               | 0.0                              |
| <i>Oxalobacteraceae</i>      | 0.0                              | 0.0                               | 0.0                              |
| <i>Bifidobacteriaceae</i>    | 0.0                              | 0.0                               | 0.0                              |
| <i>Fusobacteriaceae</i>      | 0.0                              | 0.0                               | 0.0                              |

|                                             | Overall values             |                             |                           |
|---------------------------------------------|----------------------------|-----------------------------|---------------------------|
|                                             | 5 <sup>th</sup> percentile | 95 <sup>th</sup> percentile | median relative abundance |
| <i>Erysipelotrichales incertae sedis</i>    | 0.0                        | 0.3                         | 0.0                       |
| <i>Chlamydiaceae</i>                        | 0.0                        | 0.0                         | 0.0                       |
| <i>Methanobacteriaceae</i>                  | 0.0                        | 0.0                         | 0.0                       |
| <b>Genus</b>                                |                            |                             |                           |
| <i>Treponema</i>                            | 2.2                        | 27.8                        | 13.1                      |
| <i>Prevotella</i>                           | 1.7                        | 15.8                        | 5.6                       |
| uncultured <i>Ruminococcus</i>              | 1.4                        | 9.5                         | 3.5                       |
| uncultured bacterium                        | 0.5                        | 5.0                         | 2.4                       |
| <i>Phascolarctobacterium</i>                | 0.3                        | 5.1                         | 1.8                       |
| <i>Anaerobiospirillum</i>                   | 0.1                        | 37.1                        | 1.7                       |
| <i>Lachnospiraceae incertae sedis</i>       | 0.3                        | 3.8                         | 1.4                       |
| <i>Clostridium</i>                          | 0.1                        | 4.4                         | 1.0                       |
| <i>Streptococcus</i>                        | 0.0                        | 11.1                        | 1.0                       |
| <i>Parabacteroides</i>                      | 0.3                        | 8.6                         | 0.9                       |
| <i>Lactobacillus</i>                        | 0.0                        | 6.2                         | 0.9                       |
| <i>Ruminococcus</i>                         | 0.3                        | 3.3                         | 0.7                       |
| <i>Ruminococcaceae incertae sedis</i>       | 0.1                        | 1.6                         | 0.7                       |
| uncultured <i>Planctomycetes</i>            | 0.0                        | 2.9                         | 0.6                       |
| <i>Peptostreptococcaceae incertae sedis</i> | 0.0                        | 2.5                         | 0.5                       |
| <i>Oscillospira</i>                         | 0.0                        | 1.8                         | 0.5                       |
| <i>Desulfovibrio</i>                        | 0.0                        | 1.6                         | 0.3                       |
| <i>Anaerotruncus</i>                        | 0.0                        | 0.8                         | 0.2                       |
| <i>Faecalibacterium</i>                     | 0.0                        | 1.5                         | 0.2                       |
| <i>Subdoligranulum</i>                      | 0.0                        | 0.7                         | 0.2                       |
| <i>Oribacterium</i>                         | 0.0                        | 0.6                         | 0.2                       |
| <i>Anaerovibrio</i>                         | 0.0                        | 1.2                         | 0.2                       |
| <i>Fibrobacter</i>                          | 0.0                        | 1.1                         | 0.1                       |
| <i>Megasphaera</i>                          | 0.0                        | 2.1                         | 0.1                       |
| <i>Victivallis</i>                          | 0.0                        | 0.5                         | 0.1                       |
| <i>Blautia</i>                              | 0.0                        | 0.9                         | 0.1                       |
| <i>Paludibacter</i>                         | 0.0                        | 1.8                         | 0.1                       |
| <i>Peptococcus</i>                          | 0.0                        | 0.4                         | 0.1                       |
| <i>Enterobacteriaceae-associated genera</i> | 0.0                        | 0.7                         | 0.0                       |
| <i>Bacteroides</i>                          | 0.0                        | 0.2                         | 0.0                       |
| <i>Sarcina</i>                              | 0.0                        | 0.2                         | 0.0                       |
| <i>Turicibacter</i>                         | 0.0                        | 0.2                         | 0.0                       |
| <i>Thalassospira</i>                        | 0.0                        | 0.5                         | 0.0                       |
| <i>Microvirgula</i>                         | 0.0                        | 0.1                         | 0.0                       |
| <i>Dethiosulfovibrio</i>                    | 0.0                        | 0.3                         | 0.0                       |
| <i>Coprococcus</i>                          | 0.0                        | 0.6                         | 0.0                       |
| <i>Eubacterium</i>                          | 0.0                        | 0.0                         | 0.0                       |
| <i>Anaeroplasma</i>                         | 0.0                        | 0.6                         | 0.0                       |
| <i>Spirochaeta</i>                          | 0.0                        | 0.1                         | 0.0                       |

|                                                     | Overall values             |                             |                           |
|-----------------------------------------------------|----------------------------|-----------------------------|---------------------------|
|                                                     | 5 <sup>th</sup> percentile | 95 <sup>th</sup> percentile | median relative abundance |
| <i>Helicobacter</i>                                 | 0.0                        | 0.2                         | 0.0                       |
| <i>Sutterella</i>                                   | 0.0                        | 0.5                         | 0.0                       |
| <i>Acetitomaculum</i>                               | 0.0                        | 0.7                         | 0.0                       |
| <i>Mucispirillum</i>                                | 0.0                        | 0.2                         | 0.0                       |
| <i>Catabacter</i>                                   | 0.0                        | 0.1                         | 0.0                       |
| <i>Acidaminococcus</i>                              | 0.0                        | 0.5                         | 0.0                       |
| <i>Bifidobacterium</i>                              | 0.0                        | 0.0                         | 0.0                       |
| <i>Fusobacterium</i>                                | 0.0                        | 0.0                         | 0.0                       |
| <i>Dorea</i>                                        | 0.0                        | 0.4                         | 0.0                       |
| <i>Catenibacterium</i>                              | 0.0                        | 1.0                         | 0.0                       |
| <i>Lachnospira</i>                                  | 0.0                        | 0.1                         | 0.0                       |
| <i>Solobacterium</i>                                | 0.0                        | 0.2                         | 0.0                       |
| <i>Butyricimonas</i>                                | 0.0                        | 0.0                         | 0.0                       |
| <i>Cloacibacillus</i>                               | 0.0                        | 0.0                         | 0.0                       |
| <i>Roseburia</i>                                    | 0.0                        | 0.1                         | 0.0                       |
| <i>Shuttleworthia</i>                               | 0.0                        | 0.1                         | 0.0                       |
| <i>Mitsuokella</i>                                  | 0.0                        | 0.1                         | 0.0                       |
| <i>Chlamydia</i>                                    | 0.0                        | 0.0                         | 0.0                       |
| <i>Parasporobacterium-</i><br><i>Sporobacterium</i> | 0.0                        | 0.0                         | 0.0                       |
| <i>Mogibacterium</i>                                | 0.0                        | 0.1                         | 0.0                       |
| <i>Butyrivibrio</i>                                 | 0.0                        | 0.2                         | 0.0                       |
| <i>Butyrivibrio-</i><br><i>Pseudobutyrvibrio</i>    | 0.0                        | 0.0                         | 0.0                       |
| <i>Dialister</i>                                    | 0.0                        | 0.1                         | 0.0                       |

**TABLE S7** Full outline of cecal microbiota of pigs at day 115 post-weaning

| <b>Phylum</b>                | <b>Overall values</b>            |                                   |                                  |
|------------------------------|----------------------------------|-----------------------------------|----------------------------------|
|                              | <b>5<sup>th</sup> percentile</b> | <b>95<sup>th</sup> percentile</b> | <b>median relative abundance</b> |
| <i>Firmicutes</i>            | 32.3                             | 71.5                              | 54.9                             |
| <i>Bacteroidetes</i>         | 14.2                             | 35.0                              | 23.1                             |
| <i>Proteobacteria</i>        | 2.4                              | 35.6                              | 11.5                             |
| <i>Spirochaetes</i>          | 0.3                              | 20.8                              | 3.9                              |
| <i>Lentisphaerae</i>         | 0.0                              | 2.7                               | 0.4                              |
| <i>Planctomycetes</i>        | 0.0                              | 1.3                               | 0.2                              |
| <i>Fibrobacteres</i>         | 0.0                              | 0.4                               | 0.0                              |
| <i>Synergistetes</i>         | 0.0                              | 0.3                               | 0.0                              |
| <i>Actinobacteria</i>        | 0.0                              | 0.0                               | 0.0                              |
| <i>Verrucomicrobia</i>       | 0.0                              | 5.0                               | 0.0                              |
| <i>Deferribacteres</i>       | 0.0                              | 0.0                               | 0.0                              |
| <i>Fusobacteria</i>          | 0.0                              | 0.9                               | 0.0                              |
| <i>Chlamydiae</i>            | 0.0                              | 0.0                               | 0.0                              |
| <b>Family</b>                |                                  |                                   |                                  |
| <i>Ruminococcaceae</i>       | 8.2                              | 29.9                              | 18.1                             |
| <i>Prevotellaceae</i>        | 4.3                              | 30.1                              | 13.7                             |
| <i>Lachnospiraceae</i>       | 7.1                              | 24.0                              | 11.7                             |
| <i>Veillonellaceae</i>       | 3.6                              | 27.0                              | 9.0                              |
| <i>Succinivibrionaceae</i>   | 0.0                              | 29.2                              | 4.7                              |
| <i>Spirochaetaceae</i>       | 0.3                              | 20.8                              | 3.9                              |
| <i>Peptostreptococcaceae</i> | 0.6                              | 9.1                               | 3.3                              |
| <i>Rikenellaceae</i>         | 0.8                              | 7.1                               | 2.3                              |
| <i>Porphyromonadaceae</i>    | 0.4                              | 11.3                              | 2.1                              |
| <i>Clostridiaceae</i>        | 0.0                              | 4.7                               | 1.7                              |
| <i>Desulfovibrionaceae</i>   | 0.0                              | 2.1                               | 0.6                              |
| <i>Enterobacteriaceae</i>    | 0.0                              | 7.2                               | 0.6                              |
| <i>Streptococcaceae</i>      | 0.0                              | 2.8                               | 0.6                              |
| <i>Peptococcaceae</i>        | 0.0                              | 1.2                               | 0.5                              |
| <i>Alcaligenaceae</i>        | 0.0                              | 1.4                               | 0.5                              |
| <i>Eubacteriaceae</i>        | 0.0                              | 1.1                               | 0.4                              |
| <i>Erysipelotrichaceae</i>   | 0.0                              | 1.0                               | 0.3                              |
| <i>Lactobacillaceae</i>      | 0.0                              | 4.4                               | 0.3                              |
| <i>Planctomycetaceae</i>     | 0.0                              | 1.3                               | 0.2                              |
| <i>Bacteroidaceae</i>        | 0.0                              | 2.4                               | 0.0                              |
| <i>Rhodospirillaceae</i>     | 0.0                              | 0.9                               | 0.0                              |
| <i>Neisseriaceae</i>         | 0.0                              | 7.4                               | 0.0                              |
| <i>Fibrobacteraceae</i>      | 0.0                              | 0.4                               | 0.0                              |
| <i>Victivallaceae</i>        | 0.0                              | 0.7                               | 0.0                              |
| <i>Synergistaceae</i>        | 0.0                              | 0.3                               | 0.0                              |
| <i>Anaeroplasmataceae</i>    | 0.0                              | 0.6                               | 0.0                              |
| <i>Campylobacteraceae</i>    | 0.0                              | 0.9                               | 0.0                              |
| <i>Helicobacteraceae</i>     | 0.0                              | 4.6                               | 0.0                              |
| <i>Verrucomicrobiaceae</i>   | 0.0                              | 5.0                               | 0.0                              |
| <i>Deferribacteraceae</i>    | 0.0                              | 0.0                               | 0.0                              |
| <i>Fusobacteriaceae</i>      | 0.0                              | 0.9                               | 0.0                              |
| <i>Erysipelotrichales</i>    | 0.0                              | 0.6                               | 0.0                              |
| <i>incertae sedis</i>        |                                  |                                   |                                  |

| <b>Genus</b>                                          |     |      |      |
|-------------------------------------------------------|-----|------|------|
| <i>Prevotella</i>                                     | 4.3 | 30.0 | 13.7 |
| <i>Anaerobiospirillum</i>                             | 0.0 | 29.2 | 4.7  |
| <i>Phascolarctobacterium</i>                          | 1.4 | 9.7  | 4.1  |
| <i>Treponema</i>                                      | 0.3 | 20.8 | 3.9  |
| uncultured <i>Ruminococcus</i>                        | 0.5 | 6.1  | 2.7  |
| <i>Peptostreptococcaceae</i><br><i>incertae sedis</i> | 0.5 | 7.1  | 2.6  |
| <i>Anaerovibrio</i>                                   | 0.6 | 7.3  | 2.6  |
| <i>Lachnospiraceae</i><br><i>incertae sedis</i>       | 1.1 | 5.6  | 2.2  |
| <i>Parabacteroides</i>                                | 0.3 | 11.2 | 2.1  |
| <i>Clostridium</i>                                    | 0.0 | 4.6  | 1.6  |
| uncultured bacterium                                  | 0.3 | 4.2  | 1.3  |
| <i>Ruminococcaceae</i><br><i>incertae sedis</i>       | 0.4 | 1.6  | 1.0  |
| <i>Ruminococcus</i>                                   | 0.0 | 8.7  | 0.8  |
| <i>Faecalibacterium</i>                               | 0.0 | 5.2  | 0.8  |
| <i>Oscillospira</i>                                   | 0.0 | 3.8  | 0.7  |
| <i>Desulfovibrio</i>                                  | 0.0 | 2.1  | 0.6  |
| <i>Streptococcus</i>                                  | 0.0 | 2.8  | 0.6  |
| <i>Sutterella</i>                                     | 0.0 | 1.4  | 0.5  |
| <i>Subdoligranulum</i>                                | 0.0 | 2.6  | 0.3  |
| <i>Turicibacter</i>                                   | 0.0 | 1.0  | 0.3  |
| <i>Lactobacillus</i>                                  | 0.0 | 4.4  | 0.3  |
| <i>Megasphaera</i>                                    | 0.0 | 2.5  | 0.3  |
| <i>Peptococcus</i>                                    | 0.0 | 0.8  | 0.3  |
| <i>Enterobacteriaceae</i> -<br>associated genera      | 0.0 | 5.0  | 0.3  |
| uncultured <i>Planctomycetes</i>                      | 0.0 | 1.3  | 0.2  |
| <i>Anaerotruncus</i>                                  | 0.0 | 0.6  | 0.2  |
| <i>Blautia</i>                                        | 0.0 | 1.1  | 0.1  |
| <i>Bacteroides</i>                                    | 0.0 | 2.4  | 0.0  |
| <i>Sarcina</i>                                        | 0.0 | 0.2  | 0.0  |
| <i>Thalassospira</i>                                  | 0.0 | 0.8  | 0.0  |
| <i>Microvirgula</i>                                   | 0.0 | 7.4  | 0.0  |
| <i>Paludibacter</i>                                   | 0.0 | 0.4  | 0.0  |
| <i>Fibrobacter</i>                                    | 0.0 | 0.4  | 0.0  |
| <i>Dethiosulfovibrio</i>                              | 0.0 | 0.3  | 0.0  |
| <i>Coprococcus</i>                                    | 0.0 | 1.0  | 0.0  |
| <i>Eubacterium</i>                                    | 0.0 | 0.5  | 0.0  |
| <i>Anaeroplasma</i>                                   | 0.0 | 0.6  | 0.0  |
| <i>Victivallis</i>                                    | 0.0 | 0.4  | 0.0  |
| <i>Campylobacter</i>                                  | 0.0 | 0.9  | 0.0  |
| <i>Helicobacter</i>                                   | 0.0 | 4.6  | 0.0  |
| <i>Akkermansia</i>                                    | 0.0 | 5.0  | 0.0  |
| <i>Acetitomaculum</i>                                 | 0.0 | 0.4  | 0.0  |
| <i>Mucispirillum</i>                                  | 0.0 | 0.0  | 0.0  |
| <i>Oribacterium</i>                                   | 0.0 | 0.8  | 0.0  |
| <i>Acidaminococcus</i>                                | 0.0 | 2.9  | 0.0  |

---

|                            |     |     |     |
|----------------------------|-----|-----|-----|
| <i>Fusobacterium</i>       | 0.0 | 0.9 | 0.0 |
| <i>Dorea</i>               | 0.0 | 0.0 | 0.0 |
| <i>Catenibacterium</i>     | 0.0 | 0.7 | 0.0 |
| <i>Lachnospira</i>         | 0.0 | 0.3 | 0.0 |
| <i>Solobacterium</i>       | 0.0 | 0.6 | 0.0 |
| <i>Roseburia</i>           | 0.0 | 0.2 | 0.0 |
| <i>Shuttleworthia</i>      | 0.0 | 0.2 | 0.0 |
| <i>Mitsuokella</i>         | 0.0 | 0.4 | 0.0 |
| <i>Chlamydia</i>           | 0.0 | 0.0 | 0.0 |
| <i>Butyrivibrio</i>        | 0.0 | 0.2 | 0.0 |
| <i>Dialister</i>           | 0.0 | 0.0 | 0.0 |
| <i>Deltaproteobacteria</i> | 0.0 | 0.0 | 0.0 |
| <i>Oscillibacter</i>       | 0.0 | 0.1 | 0.0 |

---



**TABLE S8** The effect of maternal feeding of GM maize on the fecal and cecal microbiota of offspring<sup>a</sup>

| Sow trt <sup>b</sup>                   | Non-GM             | GM                 | <i>P</i> - value | <i>N</i> <sup>c</sup> |
|----------------------------------------|--------------------|--------------------|------------------|-----------------------|
| <b>Feces</b>                           |                    |                    |                  |                       |
| <b>Weaning (~28 days of age)</b>       |                    |                    |                  |                       |
| <b>Family</b>                          |                    |                    |                  |                       |
| <i>Ruminococcaceae</i> <sup>#</sup>    | 12.0 (2.9 - 26.5)  | 18.5 (11.1 - 33.4) | 0.01             | 20;20                 |
| <i>Lachnospiraceae</i> <sup>†</sup>    | 15.1 (12.1 - 18.5) | 20.2 (16.6 - 24.3) | 0.04             | 20;20                 |
| <i>Clostridiaceae</i> <sup>#</sup>     | 0.1 (0 - 3.1)      | 0.6 (0 - 2.4)      | 0.03             | 10;18                 |
| <i>Victivallaceae</i> <sup>#</sup>     | 0.1 (0 - 1.3)      | 0.3 (0 - 1.6)      | 0.03             | 11;19                 |
| <b>Genus</b>                           |                    |                    |                  |                       |
| <i>Subdoligranulum</i> <sup>#</sup>    | 0.2 (0 - 1.9)      | 0.6 (0 - 2.6)      | 0.03             | 13;18                 |
| <b>Day 100 pw<sup>d</sup></b>          |                    |                    |                  |                       |
| <b>Genus</b>                           |                    |                    |                  |                       |
| <i>Ruminococcus</i> <sup>#</sup>       | 0.9 (0.3 - 4.1)    | 0.6 (0.2 - 1.8)    | 0.05             | 18;20                 |
| <b>Cecum</b>                           |                    |                    |                  |                       |
| <i>Enterobacteriaceae</i> <sup>#</sup> | 1.1 (0 - 24.1)     | 0.5 (0 - 1.6)      | 0.03             | 16;17                 |

<sup>a</sup> Data are presented as treatment means (with 95% confidence intervals) for data analyzed using parametric tests (†) or medians (with 5-95<sup>th</sup> percentiles) for data analyzed using non-parametric tests (#).

<sup>b</sup> Sows were fed a non-GM or a GM maize-based diet during gestation and lactation.

<sup>c</sup> *n* – number of animals in which the bacterial taxon was present (non-GM vs GM).

<sup>d</sup> pw - post-weaning.

**TABLE S9** Effects of feeding a GM maize-based diets to pigs from weaning for 115 days on fecal and cecal microbiota<sup>a</sup>

| <b>Offspring trt<sup>b</sup></b>     | <b>Non-GM</b>    | <b>GM</b>        | <b>P - value</b> | <b>N<sup>c</sup></b> |
|--------------------------------------|------------------|------------------|------------------|----------------------|
| <b>Feces</b>                         |                  |                  |                  |                      |
| <b>Weaning (~28 days of age)</b>     |                  |                  |                  |                      |
| <b>Family</b>                        |                  |                  |                  |                      |
| <i>Rikenellaceae</i> <sup>#</sup>    | 1.4 (0.5 - 13.4) | 4.0 (1.0 - 13.1) | 0.03             | 20;20                |
| <b>Day 100 pw<sup>d</sup></b>        |                  |                  |                  |                      |
| <b>Genus</b>                         |                  |                  |                  |                      |
| <i>Oscillospira</i> <sup>#</sup>     | 0.6 (0.2 - 2.9)  | 0.3 (0 - 1.8)    | 0.01             | 19;17                |
| <i>Faecalibacterium</i> <sup>#</sup> | 0.3 (0 - 1.7)    | 0.2 (0 - 1.5)    | 0.03             | 13;12                |
| <i>Thalassospira</i> <sup>#</sup>    | 0.1 (0 - 0.5)    | 0 (0 - 0.6)      | 0.03             | 12;3                 |
| <b>Cecum</b>                         |                  |                  |                  |                      |
| <i>Anaerotruncus</i> <sup>#</sup>    | 0 (0 - 0.5)      | 0.3 (0 - 1.0)    | 0.02             | 9;12                 |

<sup>a</sup> Data are presented as treatment means (with 95% confidence intervals) for data analyzed using parametric tests (†) or medians (with 5-95<sup>th</sup> percentiles) for data analyzed using non-parametric tests (#).

<sup>b</sup> Sows were fed a non-GM or a GM maize-based diet during gestation and lactation.

<sup>c</sup> *n* – number of animals in which the bacterial taxon was present (non-GM vs GM).

<sup>d</sup> pw - post-weaning.

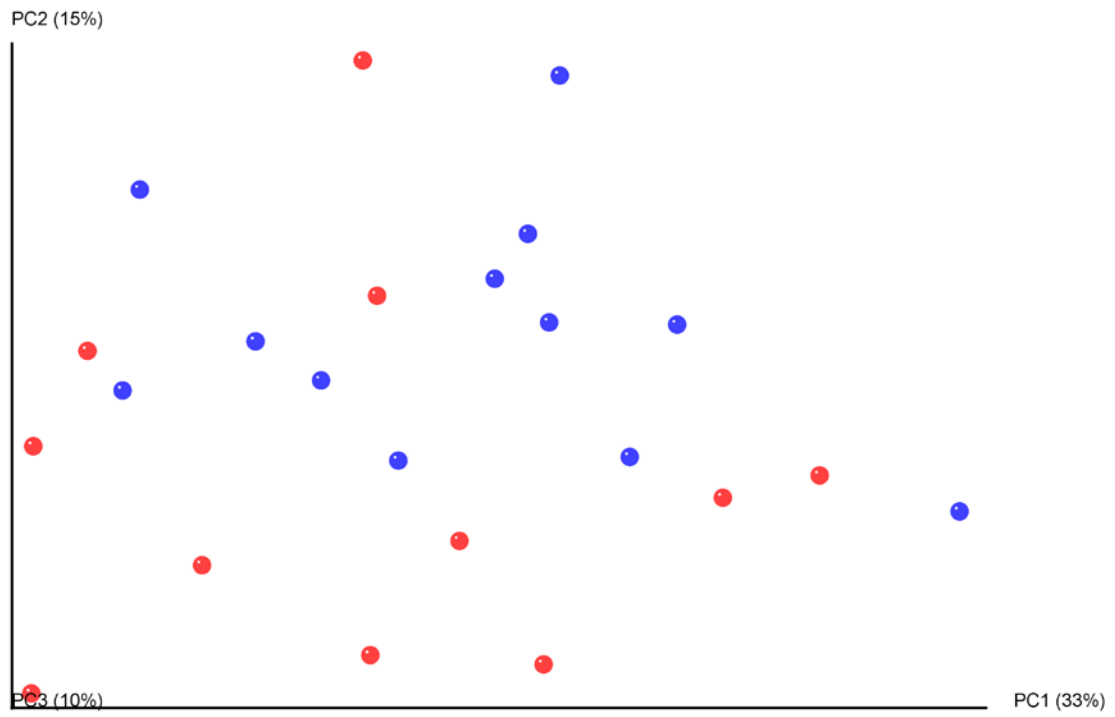

**FIG S1** Unweighted beta diversity at day 110 of gestation in the feces of sows fed a non-GM (blue) or a GM (red) maize-based diet.

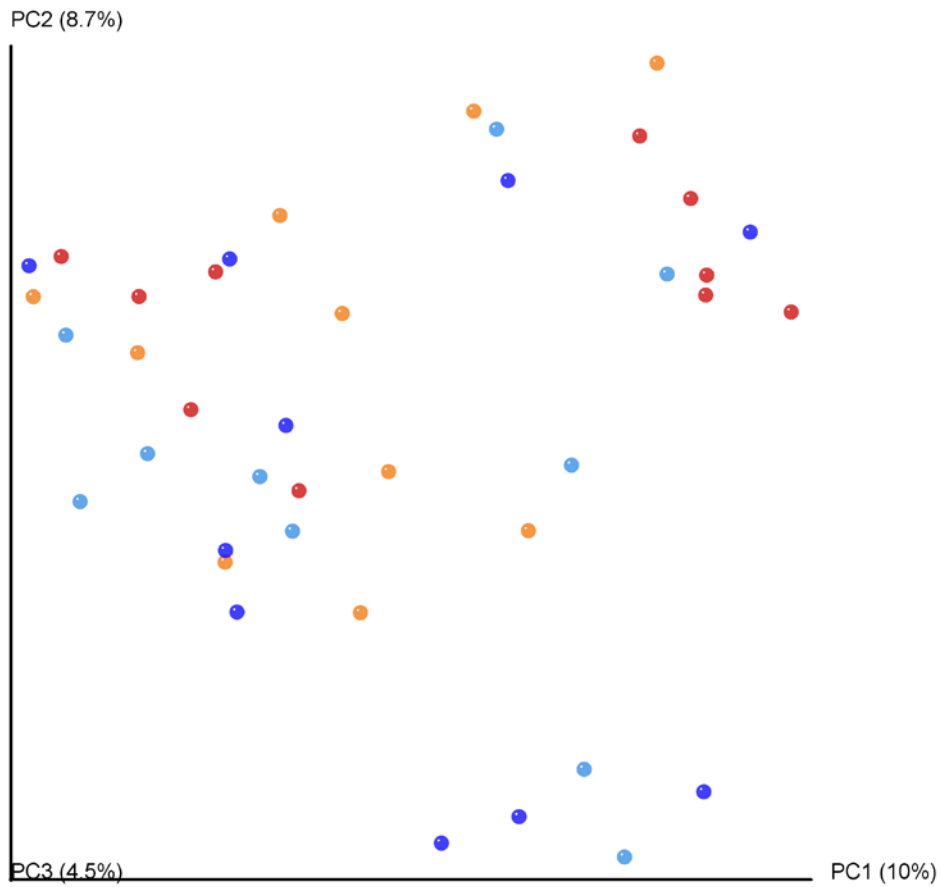

**FIG S2** Unweighted beta diversity at weaning in feces of pigs fed a non-GM or a GM maize-based diet for 115 days within sow treatments (non-GM/non-GM – blue; non-GM/GM – light blue; GM/non-GM – orange; GM/GM – red).

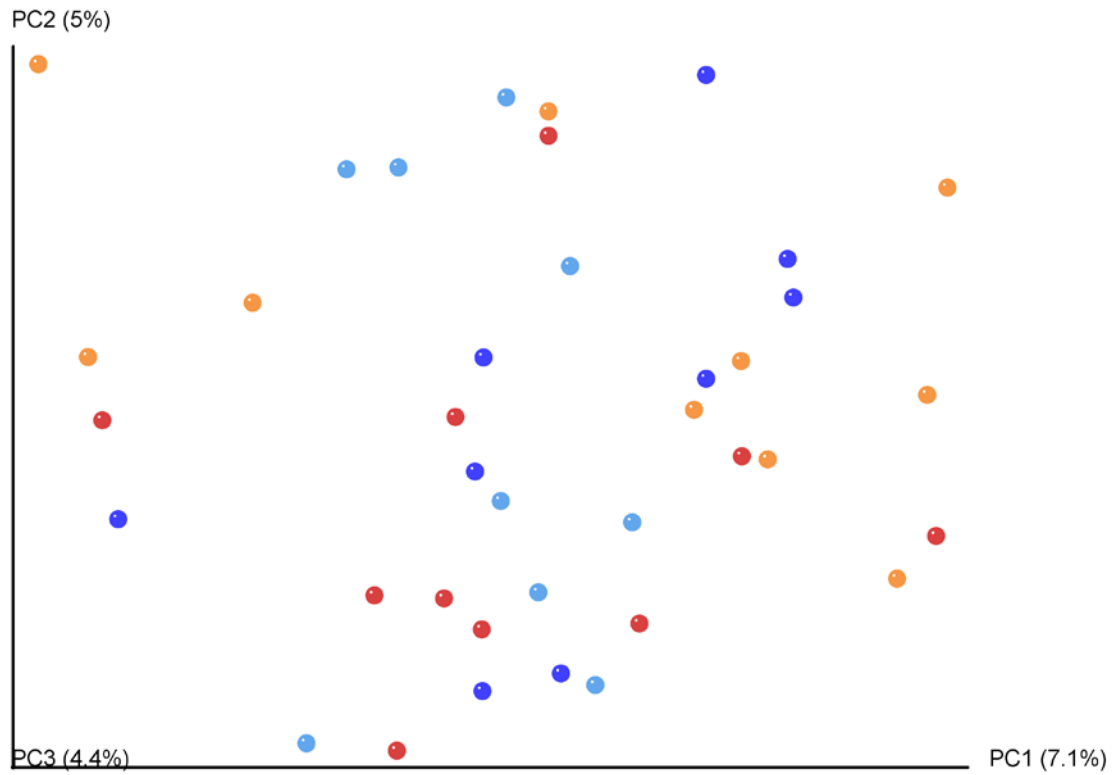

**FIG S3** Unweighted beta diversity at day 100 post-weaning in feces of pigs fed a non-GM or a GM maize-based diet for 115 days within sow treatments (non-GM/non-GM – blue; non-GM/GM – light blue; GM/non-GM – orange; GM/GM – red).

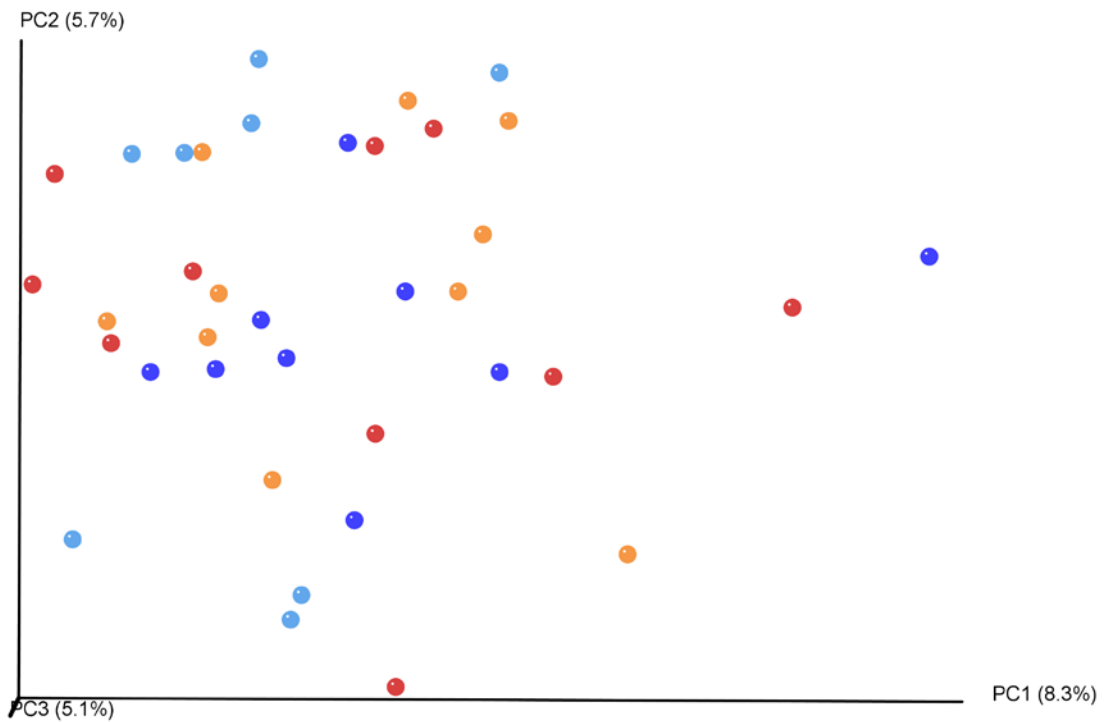

**FIG S4** Unweighted beta diversity at day 115 post-weaning in cecal digesta of pigs fed a non-GM or a GM maize-based diet for 115 days within sow treatments (non-GM/non-GM – blue; non-GM/GM – light blue; GM/non-GM – orange; GM/GM – red).
